# Supplementary material for: Different Mechanisms of Action of Regorafenib and Lenvatinib on Toll-Like Receptor-Signaling Pathways in Human Hepatoma Cell Lines
Source: PubMed Central journal article supplement (PMC7246870; doi:10.3390/ijms21093349), 2020-05-09
Supplement: ijms-21-03349-s001.pdf [file ijms-21-03349-s001.pdf]

**Table S1 The 84 genes associated with Toll-like receptor signaling pathway assessed by real-time RT-PCR, and gene expression of regorafenib (vs. lenvatinib) in the present study.**

| (A) Toll-like receptors         |                                                                    | Regorafenib (vs. Lenvatinib)<br>(Fold Change) |             |
|---------------------------------|--------------------------------------------------------------------|-----------------------------------------------|-------------|
| <i>Symbol</i>                   | Name                                                               | Huh7                                          | HepG2       |
| <i>CD180</i><br>( <i>LY64</i> ) | CD180 molecule                                                     | 1.65                                          | <b>0.25</b> |
| <i>SIGIRR</i>                   | Single immunoglobulin and Toll-interleukin 1 receptor (TIR) domain | 1.31                                          | 0.71        |
| <i>TLR1</i>                     | Toll-like receptor 1                                               | <b>1.90</b>                                   | 0.63        |
| <i>TLR2</i>                     | Toll-like receptor 2                                               | 0.70                                          | <b>4.90</b> |
| <i>TLR3</i>                     | Toll-like receptor 3                                               | <b>1.39</b>                                   | <b>0.64</b> |
| <i>TLR4</i>                     | Toll-like receptor 4                                               | <b>0.22</b>                                   | <b>0.32</b> |
| <i>TLR5</i>                     | Toll-like receptor 5                                               | 1.24                                          | 0.72        |
| <i>TLR6</i>                     | Toll-like receptor 6                                               | 0.59                                          | 0.63        |
| <i>TLR7</i>                     | Toll-like receptor 7                                               | 1.53                                          | <b>4.90</b> |
| <i>TLR8</i>                     | Toll-like receptor 8                                               | 1.32                                          | <b>4.90</b> |
| <i>TLR9</i>                     | Toll-like receptor 9                                               | 1.48                                          | 0.80        |
| <i>TLR10</i>                    | Toll-like receptor 10                                              | <b>1.97</b>                                   | <b>2.39</b> |

Bold, p <0.05; red color, p<0.05 with both cell lines and same vector.

| (B) Pathogen-specific responses: Bacterial |                                                    | Regorafenib (vs. Lenvatinib)<br>(Fold Change) |             |
|--------------------------------------------|----------------------------------------------------|-----------------------------------------------|-------------|
| <i>Symbol</i>                              | Name                                               | Huh7                                          | HepG2       |
| <i>CCL2</i><br>( <i>MCP-1</i> )            | Chemokine (C-C motif) ligand 2                     | <b>1.97</b>                                   | <b>0.31</b> |
| <i>CD14</i>                                | CD14 molecule                                      | <b>0.73</b>                                   | <b>0.25</b> |
| <i>CD180</i><br>( <i>LY64</i> )            | CD180 molecule                                     | 1.65                                          | <b>0.25</b> |
| <i>FOS</i>                                 | FBJ murine osteosarcoma viral oncogene homolog     | <b>0.05</b>                                   | 0.64        |
| <i>HRAS</i>                                | v-Ha-ras Harvey rat sarcoma viral oncogene homolog | 1.04                                          | 0.93        |
| <i>IL10</i>                                | Interleukin 10                                     | 1.70                                          | 1.29        |

|                                      |                                                                                     |             |             |
|--------------------------------------|-------------------------------------------------------------------------------------|-------------|-------------|
| <i>IL12A</i>                         | Interleukin 12A                                                                     | <b>0.59</b> | 1.04        |
| <i>IL1B</i>                          | Interleukin 1, beta                                                                 | <b>0.28</b> | <b>0.48</b> |
| <i>IL6</i>                           | Interleukin 6 (interferon, beta 2)                                                  | 3.97        | <b>0.24</b> |
| <i>IL8</i>                           | Interleukin 8                                                                       | <b>0.46</b> | <b>0.28</b> |
| <i>IRAK1</i>                         | Interleukin-1 receptor-associated kinase 1                                          | 1.05        | 1.12        |
| <i>HMGB1</i>                         | High mobility group box 1                                                           | 0.93        | 1.01        |
| <i>HSPA1A</i><br>( <i>HSP70 1A</i> ) | Heat shock 70kDa protein 1A                                                         | 0.99        | <b>0.61</b> |
| <i>JUN</i>                           | Jun proto-oncogene                                                                  | 1.75        | 0.60        |
| <i>LTA (TNFB)</i>                    | Lymphotoxin alpha (TNF superfamily, member 1)                                       | 1.11        | 0.33        |
| <i>LY86 (MD-1)</i>                   | Lymphocyte antigen 86                                                               | <b>1.93</b> | <b>4.90</b> |
| <i>LY96</i>                          | Lymphocyte antigen 96                                                               | 2.17        | 0.45        |
| <i>NFKBIA</i>                        | Nuclear factor of kappa light polypeptide gene enhancer in B-cells inhibitor, alpha | 1.23        | 0.79        |
| <i>PTGS2</i><br>( <i>COX2</i> )      | Prostaglandin-endoperoxide synthase 2                                               | 0.55        | 0.97        |
| <i>RELA</i>                          | v-rel reticuloendotheliosis oncogene homolog A (avian)                              | 1.02        | <b>0.65</b> |
| <i>RIPK2</i>                         | Receptor-interacting serine-threonine kinase 2                                      | <b>1.27</b> | 0.98        |
| <i>TLR2</i>                          | Toll-like receptor 2                                                                | 0.70        | <b>4.90</b> |
| <i>TLR4</i>                          | Toll-like receptor 4                                                                | <b>0.22</b> | <b>0.32</b> |
| <i>TLR6</i>                          | Toll-like receptor 6                                                                | 0.59        | <b>0.63</b> |
| <i>TNFRSF1A</i>                      | Tumor necrosis factor receptor superfamily, member 1A                               | 0.77        | 1.31        |
| <i>TICAM1</i><br>( <i>TRIF</i> )     | Toll-like receptor adaptor molecule 1                                               | 1.20        | 0.96        |

## (C) Pathogen-specific responses: Viral

Regorafenib (vs. Lenvatinib)  
(Fold Change)

| <i>Symbol</i>                    | Name                                                                         | Huh7        | HepG2       |
|----------------------------------|------------------------------------------------------------------------------|-------------|-------------|
| <i>EIF2AK2</i><br>( <i>PKR</i> ) | Eukaryotic translation initiation factor 2-alpha kinase 2                    | 1.11        | <b>0.69</b> |
| <i>IFNB1</i>                     | Interferon, beta 1, fibroblast                                               | 3.12        | 2.31        |
| <i>IFNG</i>                      | Interferon, gamma                                                            | <b>1.97</b> | <b>4.90</b> |
| <i>IL12A</i>                     | Interleukin 12A                                                              | <b>0.59</b> | 1.04        |
| <i>IL6</i>                       | Interleukin 6 (interferon, beta 2)                                           | 3.97        | <b>0.24</b> |
| <i>IRF3</i>                      | Interferon regulatory factor 3                                               | 1.01        | 0.90        |
| <i>PRKRA</i>                     | Protein kinase, interferon-inducible double-stranded RNA dependent activator | 1.07        | 0.86        |
| <i>RELA</i>                      | v-rel reticuloendotheliosis viral oncogene homolog A (avian)                 | 1.02        | <b>0.65</b> |
| <i>TBK1</i>                      | TRAF member-associated NFKB activator (TANK)-binding kinase 1                | 1.18        | 0.83        |
| <i>TLR3</i>                      | Toll-like receptor 3                                                         | <b>1.39</b> | <b>0.64</b> |
| <i>TLR7</i>                      | Toll-like receptor 7                                                         | 1.53        | <b>4.90</b> |
| <i>TLR8</i>                      | Toll-like receptor 8                                                         | 1.32        | <b>4.90</b> |
| <i>TNF</i>                       | Tumor necrosis factor                                                        | 0.96        | <b>0.17</b> |
| <i>TICAM1</i><br>( <i>TRIF</i> ) | Toll-like receptor adaptor molecule 1                                        | 1.20        | 0.96        |

## (D) Pathogen-specific

responses:

Regorafenib (vs. Lenvatinib)  
(Fold Change)

| <i>Symbol</i>                        | Name                                               | Huh7        | HepG2       |
|--------------------------------------|----------------------------------------------------|-------------|-------------|
| <i>CLEC4E</i>                        | C-type lectin domain family 4, member E            | <b>1.97</b> | <b>4.90</b> |
| <i>HRAS</i>                          | v-Ha-ras Harvey rat sarcoma viral oncogene homolog | 1.04        | 0.93        |
| <i>HSPA1A</i><br>( <i>HSP70 1A</i> ) | Heat shock 70kDa protein 1A                        | 0.99        | <b>0.61</b> |

|              |                                                                           |             |             |
|--------------|---------------------------------------------------------------------------|-------------|-------------|
| <i>IL8</i>   | Interleukin 8                                                             | <b>0.46</b> | <b>0.28</b> |
| <i>TLR2</i>  | Toll-like receptor 2                                                      | 0.70        | <b>4.90</b> |
| <i>TIRAP</i> | Toll-interleukin 1 receptor<br>(TIR) domain containing<br>adaptor protein | 1.09        | 1.00        |

(E) Toll-like receptor signaling: Negative regulation  
Regorafenib (vs. Lenvatinib)  
(Fold Change)

| <i>Symbol</i> | Name                                                                     | Huh7 | HepG2       |
|---------------|--------------------------------------------------------------------------|------|-------------|
| <i>SARM1</i>  | Sterile alpha and TIR motif<br>containing 1                              | 1.38 | <b>0.50</b> |
| <i>SIGIRR</i> | Single immunoglobulin and<br>Toll-interleukin 1 receptor<br>(TIR) domain | 1.31 | 0.71        |
| <i>TOLLIP</i> | Toll interacting protein                                                 | 1.22 | 0.97        |

(F) Toll-like receptor signaling: TICAM1  
(TRIF)-dependent (MYD88-independent)  
Regorafenib (vs. Lenvatinib)  
(Fold Change)

| <i>Symbol</i>                    | Name                                                                | Huh7        | HepG2       |
|----------------------------------|---------------------------------------------------------------------|-------------|-------------|
| <i>IRF3</i>                      | Interferon regulatory factor 3                                      | 1.01        | 0.90        |
| <i>MAP3K7</i><br>( <i>TAK1</i> ) | Mitogen-activated protein<br>kinase kinase kinase 7                 | 0.93        | 0.80        |
| <i>TAB1</i>                      | TGF-beta activated kinase<br>1/MAP3K7 binding protein 1             | 1.20        | 0.93        |
| <i>NR2C2</i>                     | Nuclear receptor superfamily 2,<br>group C, member 2                | 1.12        | <b>0.64</b> |
| <i>PELI1</i>                     | Pellino E3 ubiquitin protein<br>ligase 1                            | <b>0.48</b> | 0.86        |
| <i>TBK1</i>                      | TRAF member-associated<br>NFKB activator<br>(TANK)-binding kinase 1 | 1.18        | 0.83        |
| <i>TICAM2</i>                    | Toll-like receptor adaptor<br>molecule 2                            | 0.84        | <b>0.62</b> |
| <i>TLR3</i>                      | Toll-like receptor 3                                                | <b>1.39</b> | <b>0.64</b> |

|                                  |                                                               |             |             |
|----------------------------------|---------------------------------------------------------------|-------------|-------------|
| <i>TLR4</i>                      | Toll-like receptor 4                                          | <b>0.22</b> | <b>0.32</b> |
| <i>TRAF6</i>                     | TNF receptor-associated factor 6, E3 ubiquitin protein ligase | <b>1.22</b> | <b>0.61</b> |
| <i>TICAM1</i><br>( <i>TRIF</i> ) | Toll-like receptor adaptor molecule 1                         | 1.20        | 0.96        |

(G) Toll-like receptor signaling: Regorafenib (vs. Lenvatinib)  
MYD88-dependent (Fold Change)

| <i>Symbol</i>                    | Name                                                          | Huh7        | HepG2       |
|----------------------------------|---------------------------------------------------------------|-------------|-------------|
| <i>IRAK1</i>                     | Interleukin-1 receptor-associated kinase 1                    | 1.05        | 1.12        |
| <i>IRAK2</i>                     | Interleukin-1 receptor-associated kinase 2                    | 0.75        | 0.76        |
| <i>MAP3K7</i><br>( <i>TAK1</i> ) | Mitogen-activated protein kinase kinase kinase 7              | 0.93        | 0.80        |
| <i>TAB1</i>                      | TGF-beta activated kinase 1/MAP3K7 binding protein 1          | 1.20        | 0.93        |
| <i>MYD88</i>                     | Myeloid differential primary response gene (88)               | 1.09        | 0.89        |
| <i>NR2C2</i>                     | Nuclear receptor superfamily 2, group C, member 2             | 1.12        | <b>0.64</b> |
| <i>TIRAP</i>                     | TIR domain containing adaptor protein                         | 1.09        | 1.00        |
| <i>TLR1</i>                      | Toll-like receptor 1                                          | <b>1.90</b> | 0.63        |
| <i>TLR10</i>                     | Toll-like receptor 10                                         | <b>1.97</b> | <b>2.39</b> |
| <i>TLR2</i>                      | Toll-like receptor 2                                          | 0.70        | <b>4.90</b> |
| <i>TLR4</i>                      | Toll-like receptor 4                                          | <b>0.22</b> | <b>0.32</b> |
| <i>TLR5</i>                      | Toll-like receptor 5                                          | 1.24        | 0.72        |
| <i>TLR6</i>                      | Toll-like receptor 6                                          | 0.59        | <b>0.63</b> |
| <i>TLR7</i>                      | Toll-like receptor 7                                          | 1.53        | <b>4.90</b> |
| <i>TLR8</i>                      | Toll-like receptor 8                                          | 1.32        | <b>4.90</b> |
| <i>TLR9</i>                      | Toll-like receptor 9                                          | 1.48        | 0.80        |
| <i>TRAF6</i>                     | TNF receptor-associated factor 6, E3 ubiquitin protein ligase | <b>1.22</b> | <b>0.61</b> |

## (H) Downstream pathways and target genes: Regorafenib (vs. Lenvatinib)

| NF- $\kappa$ B pathway |                                                                                 | (Fold Change) |             |
|------------------------|---------------------------------------------------------------------------------|---------------|-------------|
| <i>Symbol</i>          | Name                                                                            | Huh7          | HepG2       |
| <i>BTK</i>             | Bruton agammaglobulinemia tyrosine kinase                                       | 0.33          | 0.27        |
| <i>CASP8</i>           | Caspase 8, apoptosis-related cysteine peptidase                                 | <b>0.80</b>   | 0.70        |
| <i>CHUK (IKKa)</i>     | Conserved helix-loop-helix ubiquitous kinase                                    | 0.90          | <b>0.64</b> |
| <i>ECSIT (SITPEC)</i>  | ECSIT homolog ( <i>Drosophila</i> )                                             | 1.16          | 0.83        |
| <i>FADD</i>            | Fas (TNFRSF6)-associated via death domain                                       | 0.81          | 0.87        |
| <i>IKKBK</i>           | Inhibitor of kappa light polypeptide gene enhancer in B-cells, kinase beta      | 1.14          | 0.87        |
| <i>IL10</i>            | Interleukin 10                                                                  | 1.70          | 1.29        |
| <i>IL1B</i>            | Interleukin 1, beta                                                             | <b>0.28</b>   | <b>0.48</b> |
| <i>IRAK1</i>           | Interleukin-1 receptor-associated kinase 1                                      | 1.05          | 1.12        |
| <i>IRAK2</i>           | Interleukin-1 receptor-associated kinase 2                                      | 0.75          | 0.76        |
| <i>IRF3</i>            | Interferon regulatory factor 3                                                  | 1.01          | 0.90        |
| <i>LY96</i>            | Lymphocyte antigen 96                                                           | 2.17          | 0.45        |
| <i>MAP3K1 (MEKK)</i>   | Mitogen-activated protein kinase kinase kinase 1, E3 ubiquitin protein ligase   | 1.21          | <b>0.65</b> |
| <i>MAP3K7</i>          | Mitogen-activated protein kinase kinase kinase 7                                | 0.93          | 0.80        |
| <i>NFKB1</i>           | Nuclear factor of kappa light polypeptide gene enhancer in B-cells 1            | 1.01          | 0.86        |
| <i>NFKB2</i>           | Nuclear factor of kappa light polypeptide gene enhancer in B-cells 2 (p49/p100) | 1.12          | 1           |
| <i>NFKBIA</i>          | Nuclear factor of kappa light                                                   | 1.23          | 0.79        |

|                 |                                                                                     |             |             |
|-----------------|-------------------------------------------------------------------------------------|-------------|-------------|
|                 | polypeptide gene enhancer in B-cells inhibitor, alpha                               |             |             |
| <i>NFKBIL1</i>  | Nuclear factor of kappa light polypeptide gene enhancer in B-cells inhibitor-like 1 | 1.29        | 1.30        |
| <i>NFRKB</i>    | Nuclear factor related to kappaB binding protein                                    | 0.93        | 0.95        |
| <i>PPARA</i>    | Peroxisome proliferator-activated receptor alpha                                    | 1.32        | 1.03        |
| <i>REL</i>      | v-rel reticuloendotheliosis viral oncogene homolog (avian)                          | 0.86        | <b>0.65</b> |
| <i>RELA</i>     | v-rel reticuloendotheliosis viral oncogene homolog A (avian)                        | 1.02        | <b>0.65</b> |
| <i>TNF</i>      | Tumor necrosis factor                                                               | 0.96        | <b>0.17</b> |
| <i>TNFRSF1A</i> | Tumor necrosis factor superfamily, member 1A                                        | 0.77        | 1.31        |
| <i>UBE2N</i>    | Ubiquitin-conjugating enzyme E2N                                                    | <b>0.77</b> | 0.76        |

(I) Downstream pathways and target genes: Regorafenib (vs. Lenvatinib)  
JNK/p38 pathway (Fold Change)

| <i>Symbol</i>         | Name                                                                          | Huh7        | HepG2       |
|-----------------------|-------------------------------------------------------------------------------|-------------|-------------|
| <i>ELK1</i>           | ELK1, member of ETS oncogene family                                           | 0.91        | 1.26        |
| <i>FOS</i>            | FBJ murine osteosarcoma viral oncogene homolog                                | <b>0.05</b> | 0.64        |
| <i>IL1B</i>           | Interleukin 1, beta                                                           | <b>0.28</b> | <b>0.48</b> |
| <i>JUN</i>            | Jun proto-oncogene                                                            | 1.75        | 0.60        |
| <i>MAP2K3 (MEK3)</i>  | Mitogen-activated protein kinase kinase 3                                     | 1.00        | 0.91        |
| <i>MAP2K4 (JNKK1)</i> | Mitogen-activated protein kinase kinase 4                                     | 1.02        | 0.79        |
| <i>MAP3K1 (MEKK)</i>  | Mitogen-activated protein kinase kinase kinase 1, E3 ubiquitin protein ligase | 1.21        | <b>0.65</b> |

|                     |                                                          |      |             |
|---------------------|----------------------------------------------------------|------|-------------|
| <i>MAP3K7</i>       | Mitogen-activated protein kinase kinase kinase 7         | 0.93 | 0.80        |
| <i>MAPK8 (JNK1)</i> | Mitogen-activated protein kinase 8                       | 0.94 | <b>0.67</b> |
| <i>MAPK8IP3</i>     | Mitogen-activated protein kinase 8 interacting protein 3 | 1.22 | 1.00        |
| <i>TNF</i>          | Tumor necrosis factor                                    | 0.96 | <b>0.17</b> |

(J) Downstream pathways and target genes: Regorafenib (vs. Lenvatinib)  
JAK/STAT pathway (Fold Change)

| <i>Symbol</i>                    | Name                                                 | Huh7        | HepG2       |
|----------------------------------|------------------------------------------------------|-------------|-------------|
| <i>CCL2</i><br>( <i>MCP-1</i> )  | Chemokine (C-C motif) ligand 2                       | <b>1.97</b> | <b>0.31</b> |
| <i>CSF2</i><br>( <i>GM-CSF</i> ) | Colony stimulating factor 2 (granulocyte-macrophage) | 0.34        | 0.70        |
| <i>IFNG</i>                      | Interferon, gamma                                    | <b>1.97</b> | <b>4.90</b> |
| <i>IL12A</i>                     | Interleukin 12A                                      | <b>0.59</b> | 1.04        |
| <i>IL2</i>                       | Interleukin 2                                        | <b>1.97</b> | <b>4.24</b> |
| <i>IL6</i>                       | Interleukin 6                                        | 3.97        | <b>0.24</b> |

(K) Downstream pathways and target genes: Regorafenib (vs. Lenvatinib)  
Interferon regulatory factor (IRF) pathway (Fold Change)

| <i>Symbol</i>                    | Name                              | Huh7        | HepG2       |
|----------------------------------|-----------------------------------|-------------|-------------|
| <i>CXCL10</i><br>( <i>IP10</i> ) | Chemokine (C-X-C motif) ligand 10 | <b>3.22</b> | <b>0.34</b> |
| <i>IFNA1</i>                     | Interferon, alpha 1               | <b>1.97</b> | 0.64        |
| <i>IFNB1</i>                     | Interferon, beta 1, fibroblast    | 3.12        | 2.31        |
| <i>IFNG</i>                      | Interferon, gamma                 | <b>1.97</b> | <b>4.90</b> |
| <i>IRF1</i>                      | Interferon regulatory factor 1    | 1.40        | <b>0.54</b> |
| <i>IRF3</i>                      | Interferon regulatory factor 3    | 1.01        | 0.90        |
| <i>TBK1</i>                      | TANK-binding kinase 1             | 1.18        | 0.83        |



## (L) Downstream pathways and target genes: Regorafenib (vs. Lenvatinib)

Cytokine-mediated signaling pathway (Fold Change)

| <i>Symbol</i>                   | Name                                                               | Huh7        | HepG2       |
|---------------------------------|--------------------------------------------------------------------|-------------|-------------|
| <i>CCL2</i><br>( <i>MCP-1</i> ) | Chemokine (C-C motif) ligand 2                                     | <b>1.97</b> | <b>0.31</b> |
| <i>CSF3</i> ( <i>GCSF</i> )     | Colony stimulating factor 3 (granulocyte)                          | 1.58        | 1.50        |
| <i>IL1A</i>                     | Interleukin 1, alpha                                               | 0.58        | <b>0.49</b> |
| <i>IL1B</i>                     | Interleukin 1, beta                                                | <b>0.28</b> | <b>0.48</b> |
| <i>IL6</i>                      | Interleukin 6                                                      | 3.97        | <b>0.24</b> |
| <i>IRAK1</i>                    | Interleukin-1 receptor-associated kinase 1                         | 1.05        | 1.12        |
| <i>IRAK2</i>                    | Interleukin-1 receptor-associated kinase 2                         | 0.75        | 0.76        |
| <i>RELA</i>                     | v-rel reticuloendotheliosis viral oncogene homolog A (avian)       | 1.02        | <b>0.65</b> |
| <i>SIGIRR</i>                   | Single immunoglobulin and Toll-interleukin 1 receptor (TIR) domain | 1.31        | 0.71        |
| <i>TNF</i>                      | Tumor necrosis factor                                              | 0.96        | <b>0.17</b> |
| <i>TNFRSF1A</i>                 | Tumor necrosis factor receptor superfamily, member 1A              | 0.77        | 1.31        |

## (M) Regulation of adaptive immunity Regorafenib (vs. Lenvatinib)

(Fold Change)

| <i>Symbol</i> | Name                                   | Huh7        | HepG2       |
|---------------|----------------------------------------|-------------|-------------|
| <i>CD80</i>   | CD80 antigen                           | 1.93        | 0.50        |
| <i>CD86</i>   | CD86 antigen                           | 0.76        | <b>2.09</b> |
| <i>HSPD1</i>  | Heat shock 60kDa protein1 (chaperonin) | <b>0.64</b> | <b>0.52</b> |
| <i>IFNG</i>   | Interferon, gamma                      | <b>1.97</b> | <b>4.90</b> |
| <i>IL10</i>   | Interleukin 10                         | 1.70        | 1.29        |
| <i>IL12A</i>  | Interleukin 12A                        | <b>0.59</b> | 1.04        |
| <i>IL1B</i>   | Interleukin 1, beta                    | <b>0.28</b> | <b>0.48</b> |
| <i>IL2</i>    | Interleukin 2                          | <b>1.97</b> | <b>4.24</b> |

|               |                                                               |             |             |
|---------------|---------------------------------------------------------------|-------------|-------------|
| <i>MAP3K7</i> | Mitogen-activated protein kinase kinase kinase 7              | 0.93        | 0.80        |
| <i>TRAF6</i>  | TNF receptor-associated factor 6, E3 ubiquitin protein ligase | <b>1.22</b> | <b>0.61</b> |

(N) Adaptors & TLR interacting proteins      Regorafenib (vs. Lenvatinib)  
(Fold Change)

| <i>Symbol</i>                        | Name                                                     | Huh7        | HepG2       |
|--------------------------------------|----------------------------------------------------------|-------------|-------------|
| <i>BTK</i>                           | Bruton agammaglobulinemia tyrosine kinase                | 0.33        | 0.27        |
| <i>CD14</i>                          | CD14 molecule                                            | <b>0.73</b> | <b>0.25</b> |
| <i>HMGB1</i>                         | High mobility group box 1                                | <b>0.93</b> | 1.01        |
| <i>HRAS</i>                          | v-Ha-ras Harvey rat sarcoma viral oncogene homolog       | 1.04        | 0.93        |
| <i>HSPA1A</i><br>( <i>HSP70 1A</i> ) | Heat shock 70kDa protein 1A                              | 0.99        | <b>0.61</b> |
| <i>HSPD1</i>                         | Heat shock 60kDa protein1 (chaperonin)                   | <b>0.64</b> | <b>0.52</b> |
| <i>LY86 (MD-1)</i>                   | Lymphocyte antigen 86                                    | <b>1.93</b> | <b>4.90</b> |
| <i>LY96 (MD-2)</i>                   | Lymphocyte antigen 96                                    | 2.17        | 0.45        |
| <i>MAPK8IP3</i>                      | Mitogen-activated protein kinase 8 interacting protein 3 | 1.22        | 1.00        |
| <i>MYD88</i>                         | Myeloid differentiation primary response gene (88)       | 1.09        | 0.89        |
| <i>PELI1</i>                         | Pellino E3 ubiquitin protein ligase 1                    | <b>0.48</b> | 0.86        |
| <i>RIPK2</i>                         | Receptor-interacting serine-threonine kinase 2           | <b>1.27</b> | 0.98        |
| <i>SARM1</i>                         | Sterile alpha and TIR motif containing 1                 | 1.38        | <b>0.50</b> |
| <i>TICAM1</i><br>( <i>TRIF</i> )     | Toll-like receptor adaptor molecule 1                    | 1.20        | 0.96        |
| <i>TICAM2</i><br>( <i>TRAM</i> )     | Toll-like receptor adaptor molecule 2                    | 0.84        | <b>0.62</b> |
| <i>TIRAP</i>                         | Toll-interleukin 1 receptor (TIR)                        | 1.09        | 1.00        |

|               |                                   |      |      |
|---------------|-----------------------------------|------|------|
|               | domain containing adaptor protein |      |      |
| <i>TOLLIP</i> | Toll interacting protein          | 1.22 | 0.97 |

(O) Effectors

Regorafenib (vs. Lenvatinib)  
(Fold Change)

| <i>Symbol</i>                     | Name                                                                         | Huh7        | HepG2       |
|-----------------------------------|------------------------------------------------------------------------------|-------------|-------------|
| <i>CASP8</i><br>( <i>FLICE</i> )  | Caspase 8, apoptosis-related cysteine peptide                                | <b>0.80</b> | 0.70        |
| <i>EIF2AK2</i><br>( <i>PKR</i> )  | Eukaryotic translation initiation factor 2-alpha kinase 2                    | 1.11        | <b>0.69</b> |
| <i>FADD</i>                       | Fas (TNFRSF6)-associated via death domain                                    | 0.81        | 0.87        |
| <i>IRAK1</i>                      | Interleukin-1 receptor-associated kinase 1                                   | 1.05        | 1.12        |
| <i>IRAK2</i>                      | Interleukin-1 receptor-associated kinase 2                                   | 0.75        | 0.76        |
| <i>IRAK4</i>                      | Interleukin-1 receptor-associated kinase 4                                   | 1.27        | 0.86        |
| <i>MAP3K7</i><br>( <i>TAK1</i> )  | Mitogen-activated protein kinase kinase 7                                    | 0.93        | 0.80        |
| <i>TAB1</i>                       | TGF-beta activated kinase 1/MAP3K7 binding protein 1                         | 1.20        | 0.93        |
| <i>NR2C2</i>                      | Nuclear receptor subfamily 2, group C, member 2                              | 1.12        | <b>0.64</b> |
| <i>PPARA</i>                      | Peroxisome proliferator-activated receptor alpha                             | 1.32        | 1.03        |
| <i>PRKRA</i>                      | Protein kinase, interferon-inducible double stranded RNA dependent activator | 1.07        | 0.86        |
| <i>ECSIT</i><br>( <i>SITPEC</i> ) | ECSIT homolog (Drosophila)                                                   | 1.16        | 0.83        |
| <i>TRAF6</i>                      | TNF receptor-associated factor 6, E3 ubiquitin protein ligase                | <b>1.22</b> | <b>0.61</b> |

|              |                              |        |             |      |
|--------------|------------------------------|--------|-------------|------|
| <i>UBE2N</i> | Ubiquitin-conjugating<br>E2N | enzyme | <b>0.77</b> | 0.76 |
|--------------|------------------------------|--------|-------------|------|
